# Supplementary material for: Synergistic inhibition of autophagy and neddylation pathways as a novel therapeutic approach for targeting liver cancer
Source: PubMed Central journal article supplement (PMC4496198; doi:10.18632/oncotarget.3282), 2015-03-13
Supplement: oncotarget-06-9002-s001.pdf [file oncotarget-06-9002-s001.pdf]

## SUPPLEMENTARY FIGURES AND TABLES

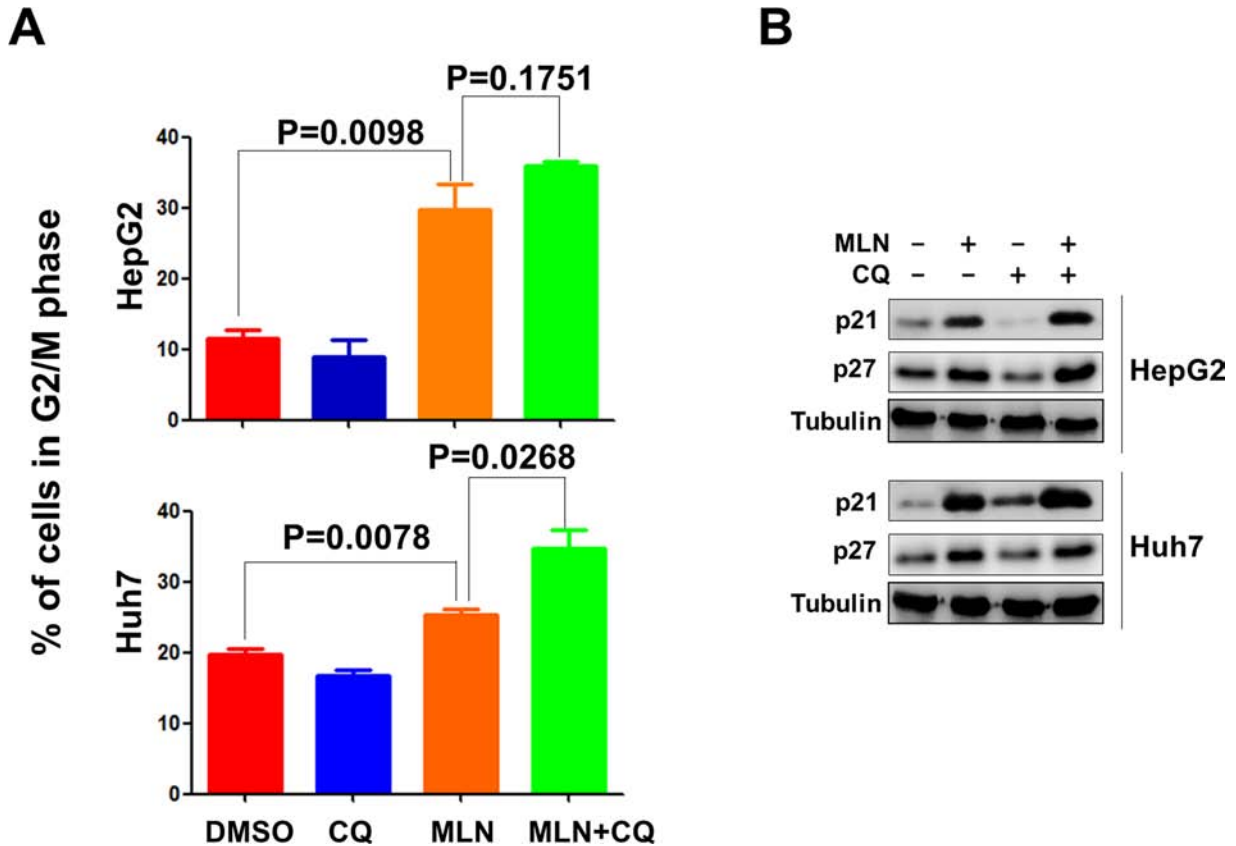

**Supplementary Figure S1: The effect of autophagy inhibition on cell cycle.** (A) Cell cycle arrest is triggered by MLN+CQ or MLN4924 treatment alone. HepG2 and Huh7 cells were treated with CQ (10  $\mu$ M), MLN4924 (0.33  $\mu$ M) or both for 24 hours and the cell cycle profile of treated cells is determined by flow cytometry, the distribution of G2/M phase is showed. (B) The effect of autophagy inhibition on the expression of cell cycle related proteins. Cells were treated as described in (A). Cell extracts were prepared, and equal amounts of protein were separated by SDS-PAGE and subjected to immunoblotting analysis with the indicated antibodies. Tubulin served as a loading control.

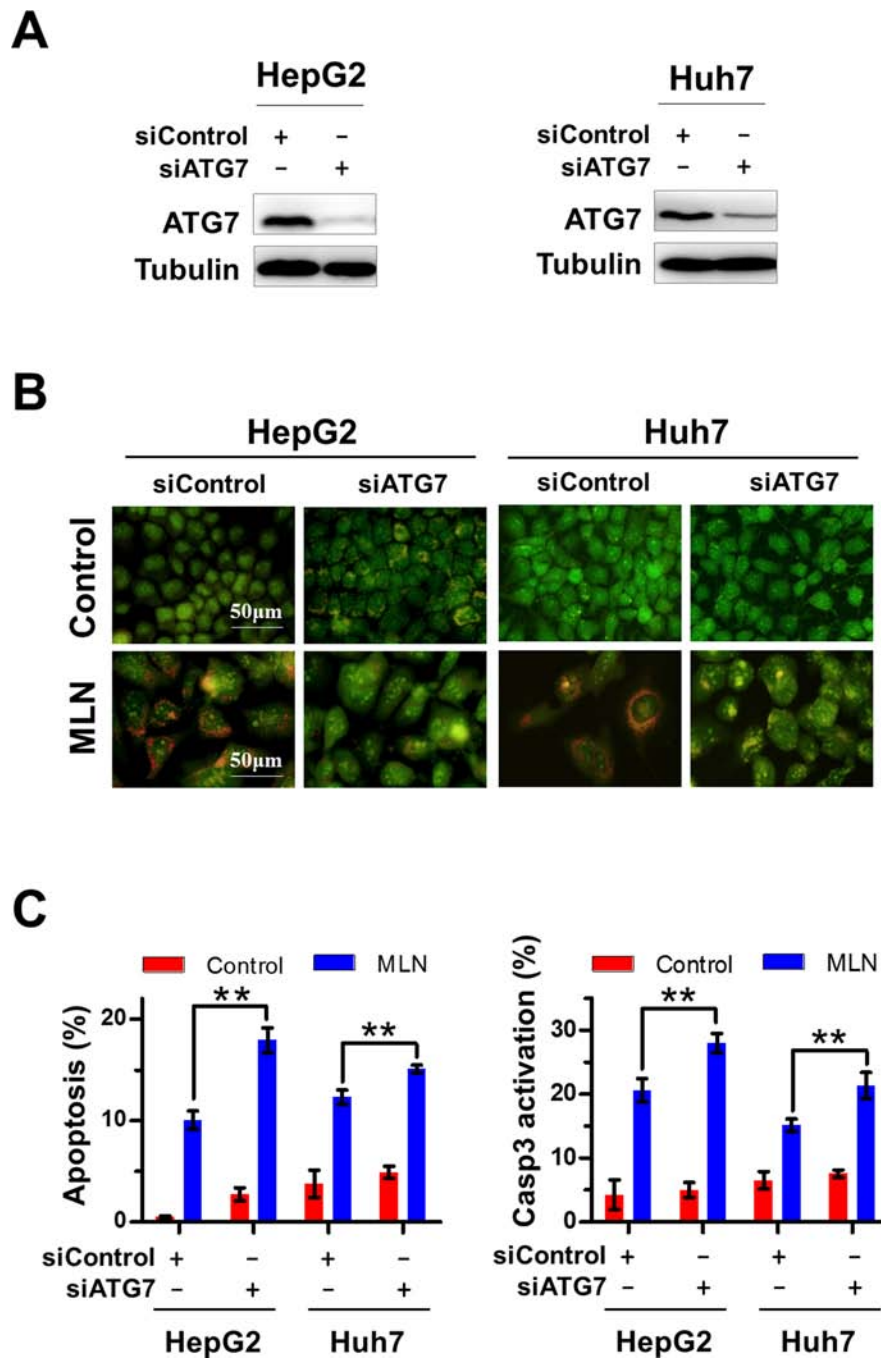

**Supplementary Figure S2: Knockdown of ATG7 increases MLN4924-induced apoptosis.** Cells transiently transfected with control siRNA or ATG7 siRNA for 24 hours and then were treated with MLN4924 (0.33  $\mu$ M) for 72 hours. Knockdown efficiency was determined by immunoblotting (A); blockage of autophagy was determined by AO staining (B); Apoptotic cell death was analyzed by the Annexin V-FITC/PI and caspase-3 activity assays (C). All data are representative of three independent experiments (\*\* $P < 0.01$ ,  $n = 3$ ).

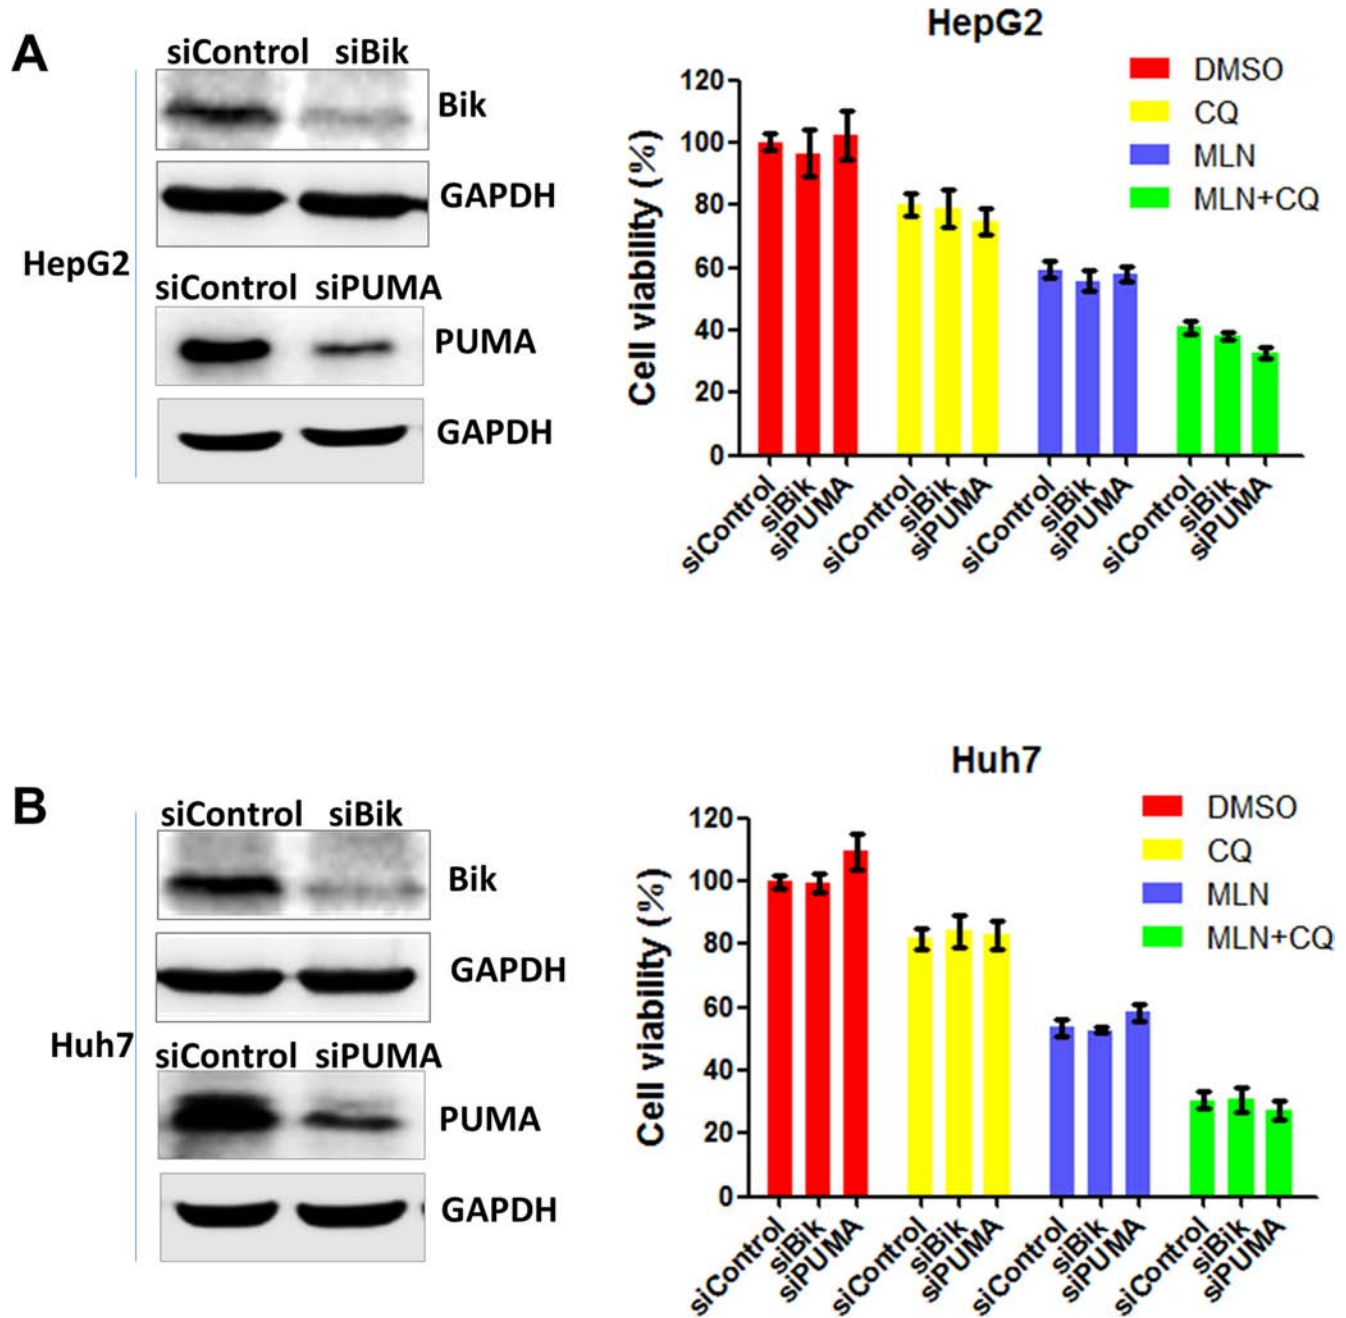

**Supplementary Figure S3: Effect of down-regulation of BIK or PUMA on liver-cancer-cell proliferation inhibition induced by MLN4924+CQ.** Cells transiently transfected with control siRNA, Bik or Puma siRNA for 24 hours and then were treated with MLN4924 (0.33  $\mu$ M) for 72 hours. Knockdown efficiency was determined by immunoblotting (A); Cell viability was measured using the ATPLite assay (B).

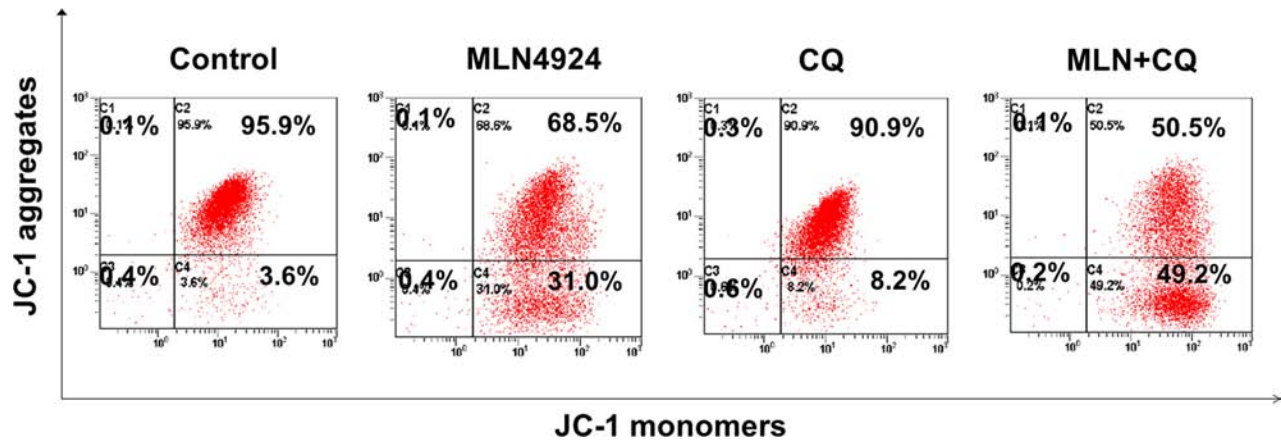

**Supplementary Figure S4: Blockage of autophagy enhances mitochondrial membrane depolarization.** HepG2 cells were treated with drugs as indicated. Mitochondrial membrane depolarization was detected with mitochondrial membrane potential assay kit with JC-1, according to the manufacturer's protocol (Yeasen, shanghai, China). All data are representative of three independent experiments.

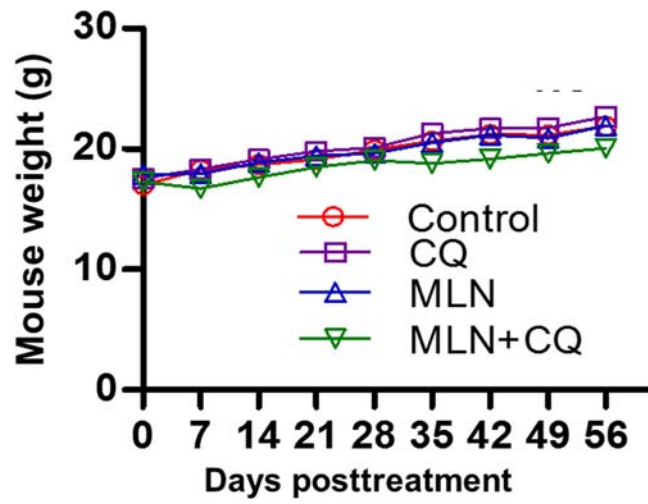

**Supplementary Figure S5: No obvious toxicity against body weight gain was observed during treatment.** Body weight of the animals was measured twice a week during the treatment period.

**Supplementary Table S1. siRNA sequences used to silence target genes**

| Targeted Gene | Sequence                    |
|---------------|-----------------------------|
| ATG7          | 5'-GGAGUCACAGCUCUCCUU-3'    |
| NOXA-1        | 5'-GUAAUUAUUGACACAUUUC-3'   |
| NOXA-2        | 5'-GGUGCACGUUUCAUCAAUUUG-3' |
| Bik-1         | 5'-CGGUUUCACCACACUUAAG-3'   |
| Bik-2         | 5'-ACGACCAGACUGAGGACAU-3'   |
| Bik-3         | 5'-GCAGUGACGCAUUGGCCCU-3'   |
| Puma-1        | 5'-GGGUCCUGUACAAUCUCAU-3'   |
| Puma-2        | 5'-UCUCUGCACCAUGUAGCAU-3'   |
| Puma-3        | 5'-CGAGAUGGAGCCCAAUUAG-3'   |
| CDT1-1        | 5'-CGUGGAUGAAGUACCCGACUU-3' |
| CDT1-2        | 5'-GCAAUGUUGGCCAGAUAUU-3'   |
| ORC1-1        | 5'-CUGCACUACCAAACCUAUA-3'   |
| ORC1-2        | 5'-AAGGUCCCGGCUCAAGCAUGU-3' |
| Control       | 5'-UUCUCCGAACGUGUCACGU-3'   |

**Supplementary Table S2. Primers used to detect the mRNA level of *NOXA*, *Bik* and *Puma* with Q-PCR**

| Gene          | Sequence                   |
|---------------|----------------------------|
| NOXA-forward  | 5'-GGAGATGCCTGGGAAGA-3'    |
| NOXA-reverse  | 5'-TTCTGCCGGAAGTTCAGT-3'   |
| Bik-forward   | 5'-TTCATCTACGACCAGACT-3'   |
| Bik-reverse   | 5'-ATCTCCAGAACCTCATTATG-3' |
| Puma-forward  | 5'-GCCCAGCCTGTAAGATAC-3'   |
| Puma-reverse  | 5'-TTCCACTGTTCCAATCTGA-3'  |
| GAPDH-forward | 5'-AAAGGGTCATCATCTCTG-3'   |
| GAPDH-reverse | 5'-GCTGTTGTCATACTTCTC-3'   |

**Supplementary Table S3. Analysis of the expression of apoptosis-regulatory genes by human apoptosis PCR array**

| position | Gene      | MLN/   | CQ/    | MLN-CQ/ | MLN-CQ/ |
|----------|-----------|--------|--------|---------|---------|
|          |           | DMSO   | DMSO   | DMSO    | MLN     |
| A1       | DFFA      | 1.91   | -1.27  | 1.57    | -1.21   |
| A2       | CASP9     | 2.17   | -1.01  | 1.83    | -1.19   |
| A3       | CIDEA     | 1.39   | 1.06   | 12.87   | 9.26    |
| A4       | CD27      | 2.94   | -1.90  | 12.15   | 4.13    |
| A5       | TNF       | -8.61  | 1.99   | -9.83   | -1.14   |
| A6       | CIDEB     | -1.63  | 1.34   | -2.27   | -1.39   |
| A7       | TNFRSF10B | 2.28   | 2.29   | 3.39    | 1.49    |
| A8       | TNFRSF10A | 3.63   | 5.28   | 14.25   | 3.92    |
| A9       | TP53      | 1.70   | 1.28   | 1.24    | -1.37   |
| A10      | CD70      | 5.97   | -1.13  | 19.33   | 3.24    |
| A11      | BCL2      | -21.42 | -70.33 | -10.08  | 2.13    |
| A12      | BCL2L1    | 4.02   | 2.14   | 3.60    | -1.12   |
| B1       | DAPK1     | 1.00   | 1.55   | 1.52    | 1.51    |
| B2       | NFKB1     | 1.65   | 1.45   | 2.69    | 1.63    |
| B3       | CASP6     | -1.90  | -1.01  | -3.16   | -1.67   |
| B4       | IGF1R     | -7.61  | -17.22 | -18.85  | -2.48   |
| B5       | AKT1      | -3.24  | -8.04  | -5.16   | -1.60   |
| B6       | GADD45A   | 4.31   | 2.07   | 15.92   | 3.69    |
| B7       | XIAP      | 2.92   | 1.60   | 5.20    | 1.78    |
| B8       | AIFM1     | -1.23  | -1.02  | -1.76   | -1.43   |
| B9       | CASP3     | 1.84   | 1.37   | 1.98    | 1.08    |
| B10      | CD40LG    | -8.23  | -21.25 | -16.11  | -1.96   |
| B11      | FADD      | -1.10  | 1.03   | 2.21    | 2.43    |
| B12      | APAF1     | 3.06   | 2.47   | 3.98    | 1.30    |
| C1       | CASP7     | 2.16   | 1.87   | 2.42    | 1.12    |
| C2       | BIRC3     | 132.62 | 10.95  | 430.37  | 3.25    |
| C3       | BIRC2     | 2.48   | 1.65   | 3.76    | 1.51    |
| C4       | RIPK2     | 1.14   | 1.34   | 1.21    | 1.06    |
| C5       | CASP4     | -1.33  | 2.12   | 1.13    | 1.50    |
| C6       | CASP5     | -1.21  | 1.84   | -1.07   | 1.13    |
| C7       | CASP1     | -1.37  | 2.72   | 2.50    | 3.41    |
| C8       | CASP2     | 2.15   | 1.40   | 2.77    | 1.29    |
| C9       | BIRC5     | -1.34  | -1.51  | 1.16    | 1.56    |
| C10      | CASP10    | 2.62   | 1.54   | 1.04    | -2.52   |

(Continued)



| position | Gene      | MLN/   | CQ/    | MLN-CQ/ | MLN-CQ/ |
|----------|-----------|--------|--------|---------|---------|
|          |           | DMSO   | DMSO   | DMSO    | MLN     |
| C11      | CASP8     | 4.35   | 2.26   | 2.80    | -1.55   |
| C12      | FASLG     | 9.37   | 4.80   | 22.00   | 2.35    |
| D1       | IL10      | -22.64 | -27.02 | -10.83  | 2.09    |
| D2       | TP73      | -3.54  | 2.83   | -14.46  | -4.09   |
| D3       | CD40      | 1.78   | -1.46  | 6.99    | 3.92    |
| D4       | NOD1      | -2.02  | -1.03  | -3.92   | -1.94   |
| D5       | BRAF      | -1.45  | 1.18   | -1.03   | 1.40    |
| D6       | MCL1      | 2.87   | 1.67   | 4.07    | 1.42    |
| D7       | ABL1      | 14.87  | 4.66   | 14.72   | -1.01   |
| D8       | BAG1      | -1.68  | -1.19  | -1.45   | 1.16    |
| D9       | BAG3      | 2.20   | 1.09   | 1.81    | -1.21   |
| D10      | BCL10     | -1.32  | -1.28  | 1.41    | 1.86    |
| D11      | BCL2A1    | 3.63   | 1.40   | 14.25   | 3.92    |
| D12      | BCL2L10   | 3.63   | 1.40   | 14.25   | 3.92    |
| E1       | BCL2L2    | 3.30   | 1.95   | 4.24    | 1.28    |
| E2       | BFAR      | 1.31   | 1.33   | 2.07    | 1.58    |
| E3       | BIRC6     | 1.28   | 1.22   | 1.04    | -1.23   |
| E4       | BNIP2     | 1.52   | 1.15   | 2.64    | 1.74    |
| E5       | BNIP3     | -4.49  | 1.72   | -3.92   | 1.14    |
| E6       | BNIP3L    | 1.79   | 2.03   | 2.66    | 1.49    |
| E7       | CASP14    | 1.36   | -1.05  | 12.52   | 9.22    |
| E8       | CFLAR     | 1.30   | -1.43  | 1.69    | 1.30    |
| E9       | CRADD     | -1.63  | 1.50   | -2.14   | -1.31   |
| E10      | CYCS      | -1.15  | -1.78  | -1.35   | -1.17   |
| E11      | DIABLO    | -1.03  | -1.41  | -1.69   | -1.65   |
| E12      | FAS       | -1.49  | -1.18  | 2.52    | 3.77    |
| F1       | STAT3     | 6.82   | 1.61   | 8.90    | 1.31    |
| F2       | LTA       | 6.89   | 1.04   | 10.53   | 1.53    |
| F3       | LTBR      | 1.71   | 1.32   | 2.06    | 1.20    |
| F4       | NAIP      | 1.70   | 1.89   | 1.27    | -1.34   |
| F5       | NOL3      | 1.30   | 1.28   | 2.17    | 1.67    |
| F6       | PYCARD    | 5.25   | 3.44   | 17.10   | 3.26    |
| F7       | TNFRSF11B | 4.76   | 2.09   | 4.81    | 1.01    |
| F8       | TNFRSF1A  | 2.43   | 2.06   | 1.92    | -1.27   |
| F9       | TNFRSF1B  | 1.91   | 1.44   | 1.84    | -1.04   |
| F10      | TNFRSF21  | 5.85   | 1.19   | 3.67    | -1.59   |

(Continued)

| position | Gene        | MLN/  | CQ/   | MLN-CQ/ | MLN-CQ/ |
|----------|-------------|-------|-------|---------|---------|
|          |             | DMSO  | DMSO  | DMSO    | MLN     |
| F11      | TNFRSF25    | -1.83 | 2.10  | 1.37    | 2.51    |
| F12      | TNFRSF9     | 68.01 | 19.97 | 210.27  | 3.09    |
| G1       | TNFSF10     | -1.47 | 1.92  | -1.51   | -1.03   |
| G2       | TNFSF8      | 34.24 | 1.40  | 14.25   | -2.40   |
| G3       | TP53BP2     | 1.96  | 2.86  | 2.76    | 1.40    |
| G4       | TRADD       | 13.50 | 2.32  | 16.03   | 1.19    |
| G5       | TRAF2       | 2.20  | 1.31  | 2.02    | -1.09   |
| G6       | TRAF3       | 1.58  | 1.55  | 1.56    | -1.02   |
| G7       | STAT1       | 1.80  | -1.36 | 1.87    | 1.04    |
| G8       | CDC2        | 2.02  | 1.43  | 2.08    | 1.03    |
| G9       | BAD         | 31.58 | 17.71 | 102.26  | 3.24    |
| G10      | BCL2L11     | 2.72  | -1.37 | 4.78    | 1.76    |
| G11      | BID         | 1.63  | -1.20 | 1.50    | -1.09   |
| G12      | <b>Bik</b>  | 35.86 | 1.45  | 38.66   | 1.08    |
| H1       | BAX         | 1.81  | 1.56  | 2.93    | 1.62    |
| H2       | <b>NOXA</b> | 5.21  | 7.08  | 60.83   | 11.67   |
| H3       | <b>Puma</b> | 2.58  | 4.42  | 14.30   | 5.55    |
| H4       | BIRC7       | -1.02 | -2.02 | 4.51    | 4.62    |
